# Supplementary material for: Smart-phone attachable, flow-assisted magnetic focusing device
Source: Royal Society of Chemistry journal article supplement (doi:10.1039/c6ra19483d), 2016-01-01
Supplement: c6ra19483d1.pdf [file c6ra19483d1.pdf]

## Supplementary Information

# Smart-phone attachable, flow-assisted magnetic focusing device

Reza Amin<sup>1</sup>, Stephanie Knowlton<sup>2</sup>, Bekir Yenilmez<sup>1</sup>, Alexander Hart<sup>2</sup>, Ashwini

Joshi<sup>2</sup>, and Savas Tasoglu<sup>1,2,¥</sup>

<sup>1</sup>*Department of Mechanical Engineering, University of Connecticut, Storrs, CT 06269.*

<sup>2</sup>*Department of Biomedical Engineering, University of Connecticut, Storrs, CT 06269.*

<sup>¥</sup>*Corresponding Author: Savas Tasoglu (savas@engr.uconn.edu)*

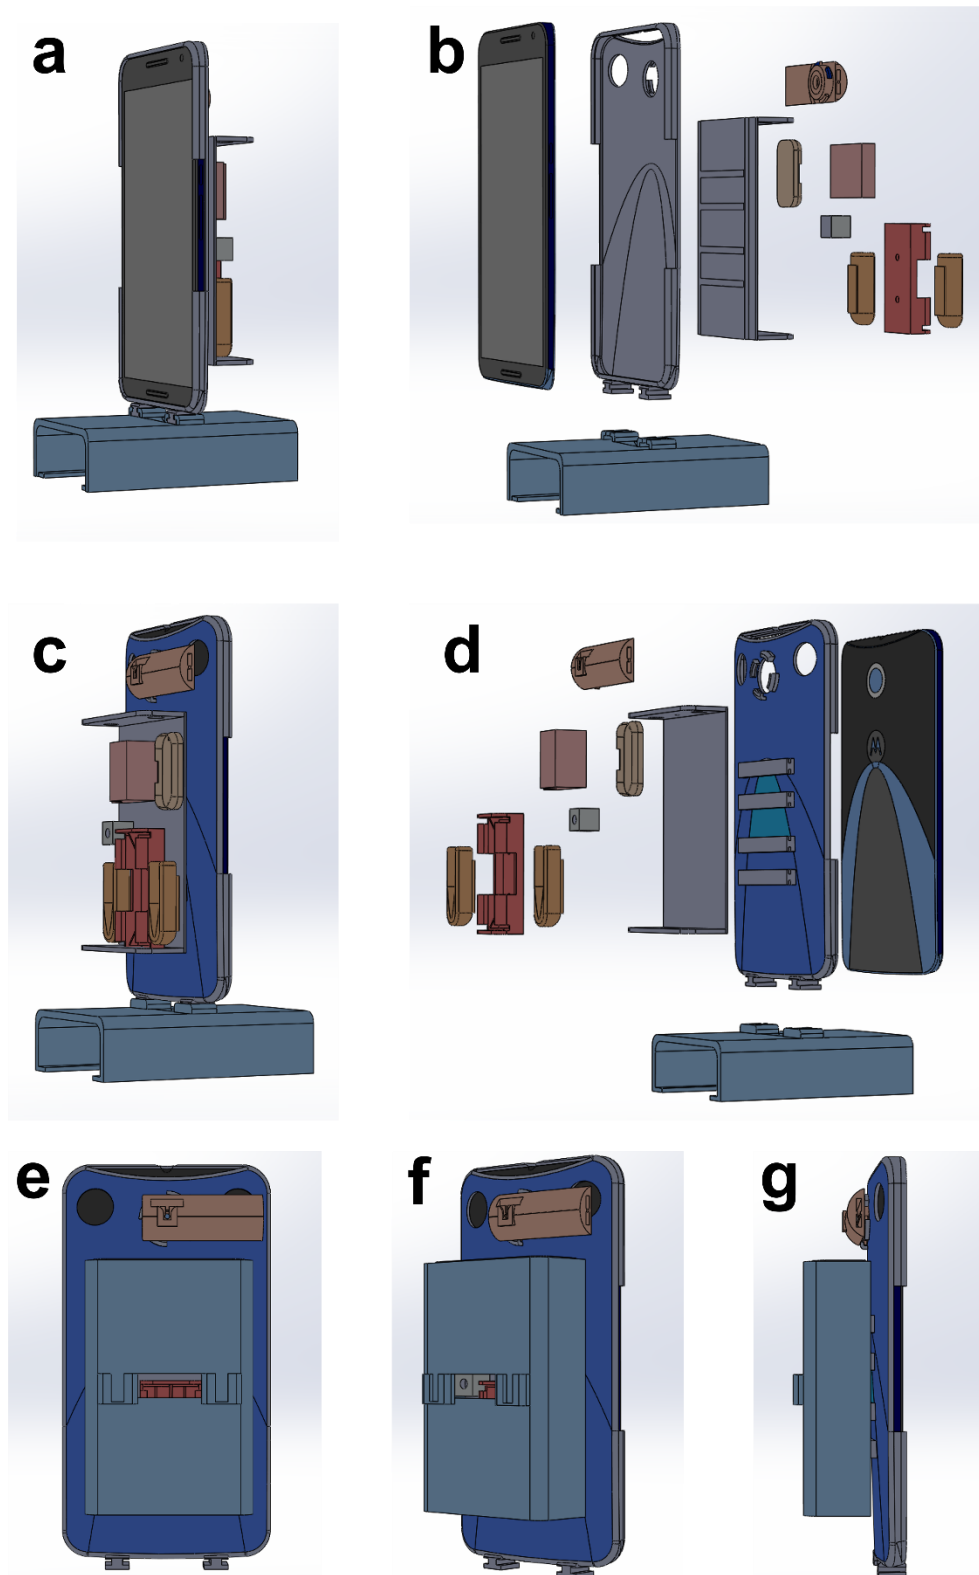

**Supplementary Figure 1. 3D CAD design of the setup. (a)** Front view of the setup. **(b)** Front exploded view of the setup. **(c)** Back view of the setup. **(d)** Back exploded view of the setup. **(e-g)** Different views of the stand covering the instruments.

| Pump flow rate (μL/s) vs voltage percentage (PWM) and frequency (Hz) |             |       |       |        |
|----------------------------------------------------------------------|-------------|-------|-------|--------|
| voltage percentage                                                   | 25 Hz       | 50 Hz | 75 Hz | 100 Hz |
| 0                                                                    | 0           | 0     | 0     | 0      |
| 20%                                                                  | 1.95        | 2.27  | 2.3   | 2.4    |
| 39%                                                                  | 12.67       | 12.3  | 11.2  | 12.8   |
| 59%                                                                  | 21.3        | 22    | 22.6  | 23.6   |
| 100%                                                                 | 27.08       | 37.7  | 44.4  | 51.2   |
| Startup capability                                                   |             |       |       |        |
|                                                                      | Not capable |       |       |        |
|                                                                      | Poor        |       |       |        |
|                                                                      | Good        |       |       |        |

**Supplementary Figure 2. Mp6 Micro pump flow rate vs frequency and voltage.** The above flow rates has been measured when the pump was placed in the setup and the adjustable orifice was fully open.

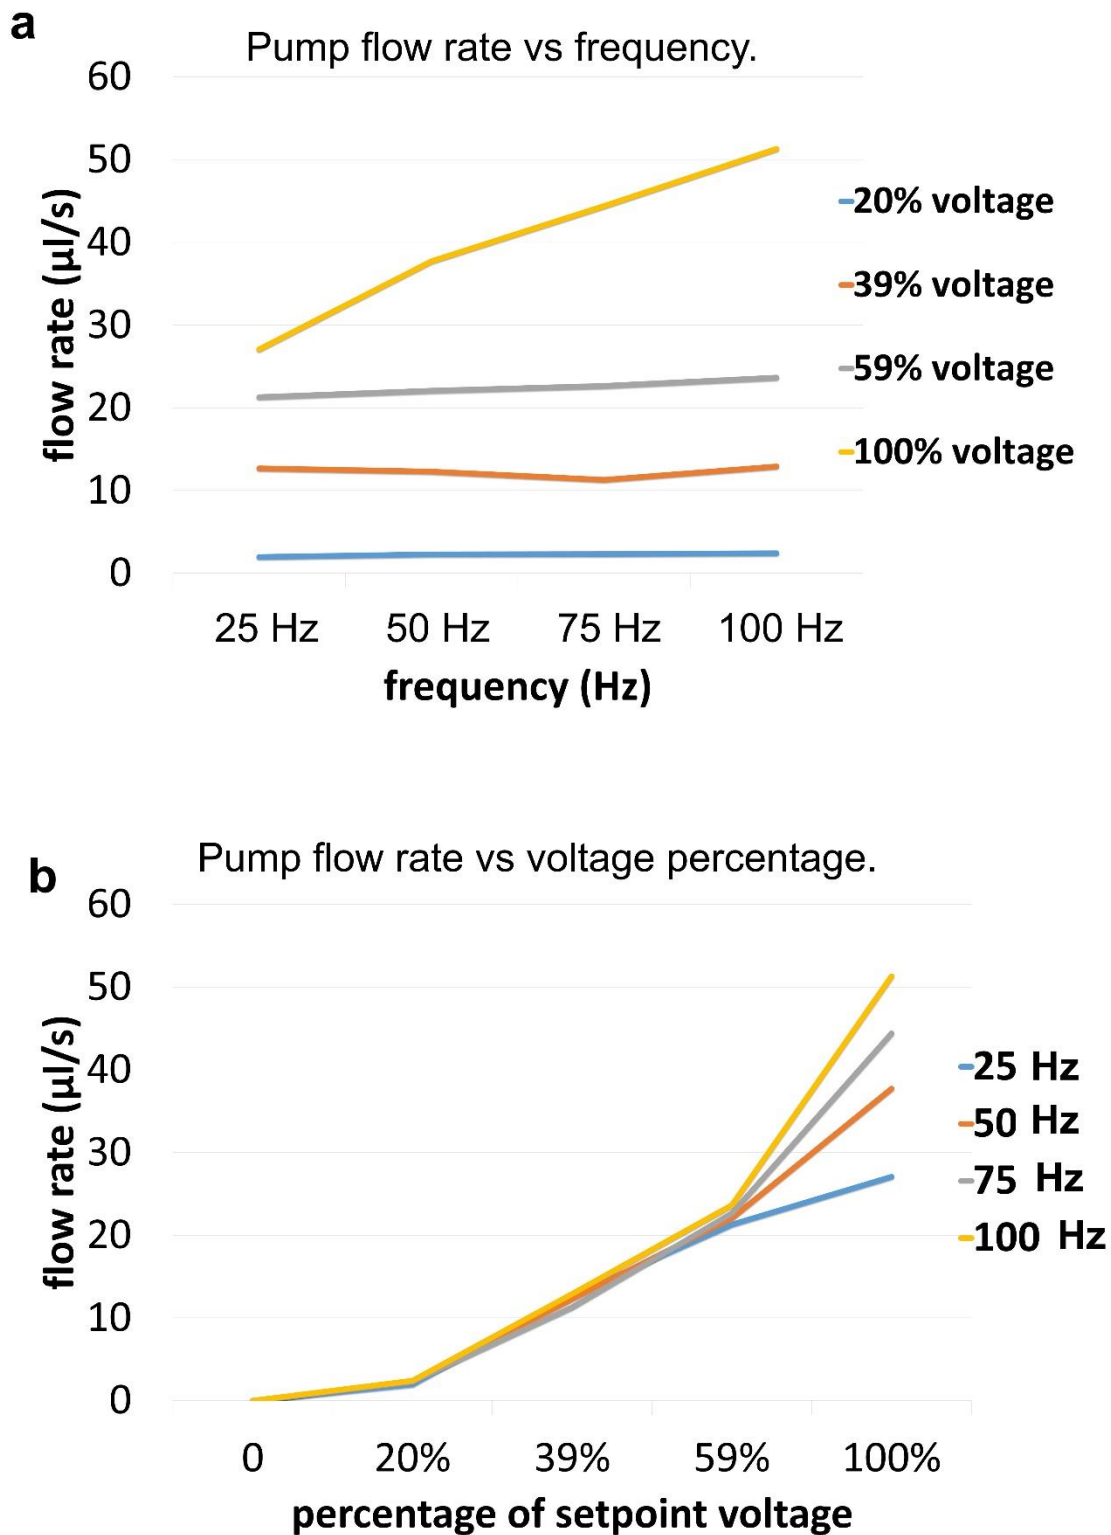

**Supplementary Figure 3. Characteristics of Mp6 micro pump (based on the data form Supplementary Figure 2). (a) Pump flow rate vs frequency. (b) Pump flow rate vs voltage percentage.**

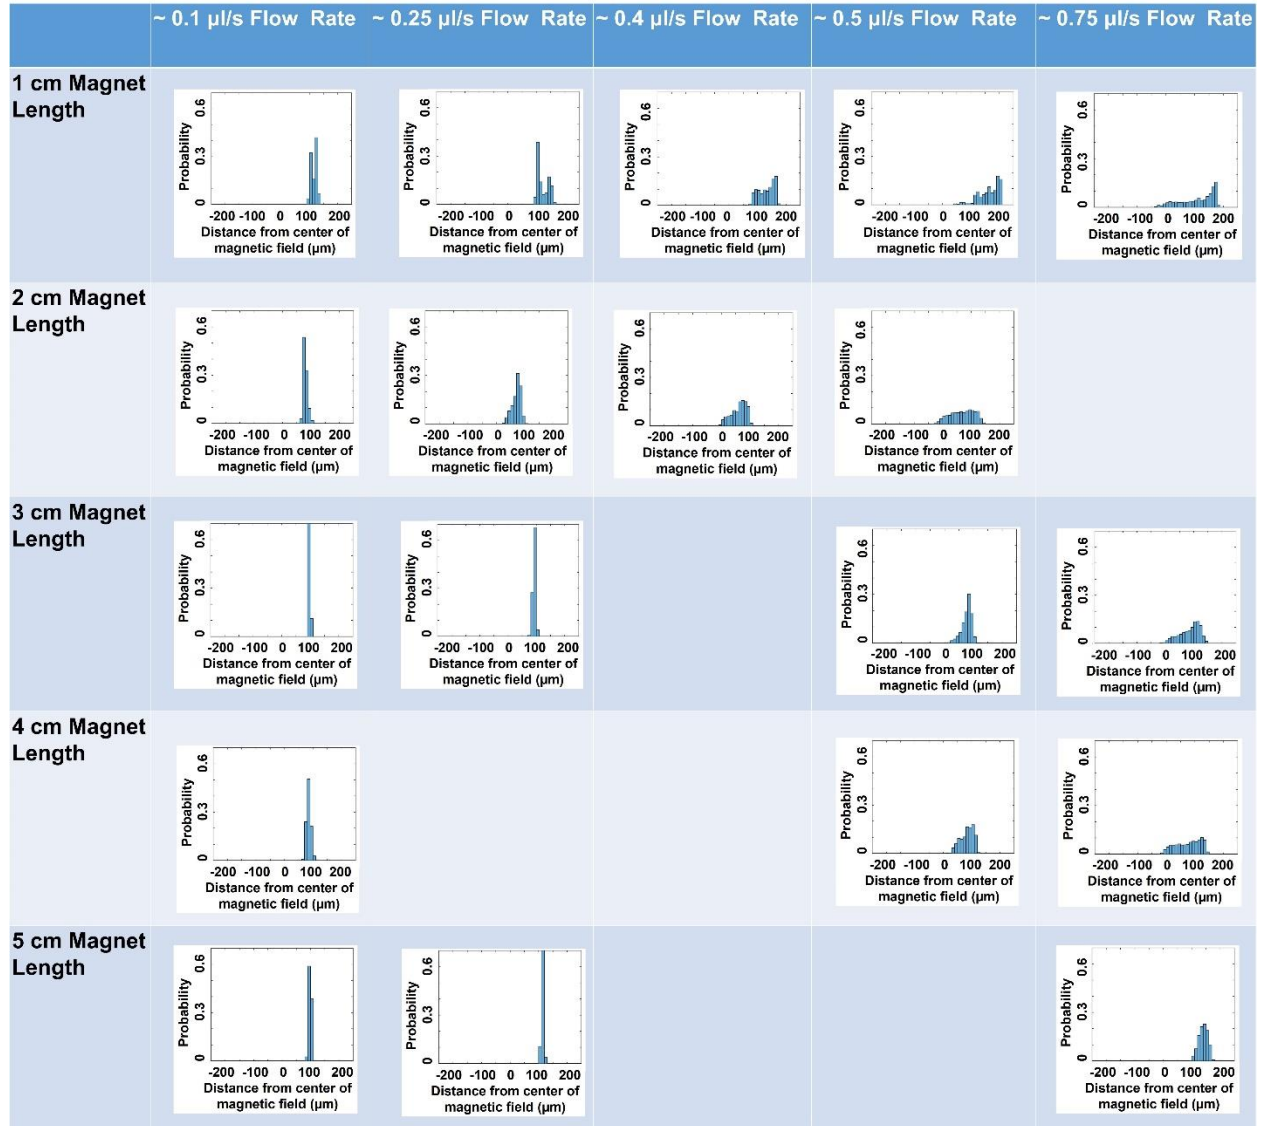

**Supplementary Figure 4.** Micro object focusing for different flow rates and magnet length.
